# Supplementary material for: Faecal Diagnostic Biomarkers for Colorectal Cancer
Source: MDPI journal article supplement (doi:10.3390/cancers13215568), 2021-11-07
Supplement: s1 [file s1]

# Diagnostic biomarkers as predictors of colorectal cancer

Andrea Cruz <sup>1\*</sup>, Carla M. Carvalho <sup>1\*</sup>, Alexandra Cunha <sup>1</sup>, Anais Crespo <sup>2</sup>, Águeda Iglesias <sup>2</sup>, Laura García-Nímo <sup>3</sup>, Paulo P. Freitas <sup>1‡</sup> and Joaquín Cubiella <sup>2‡,\*</sup>

Supplementary Materials:

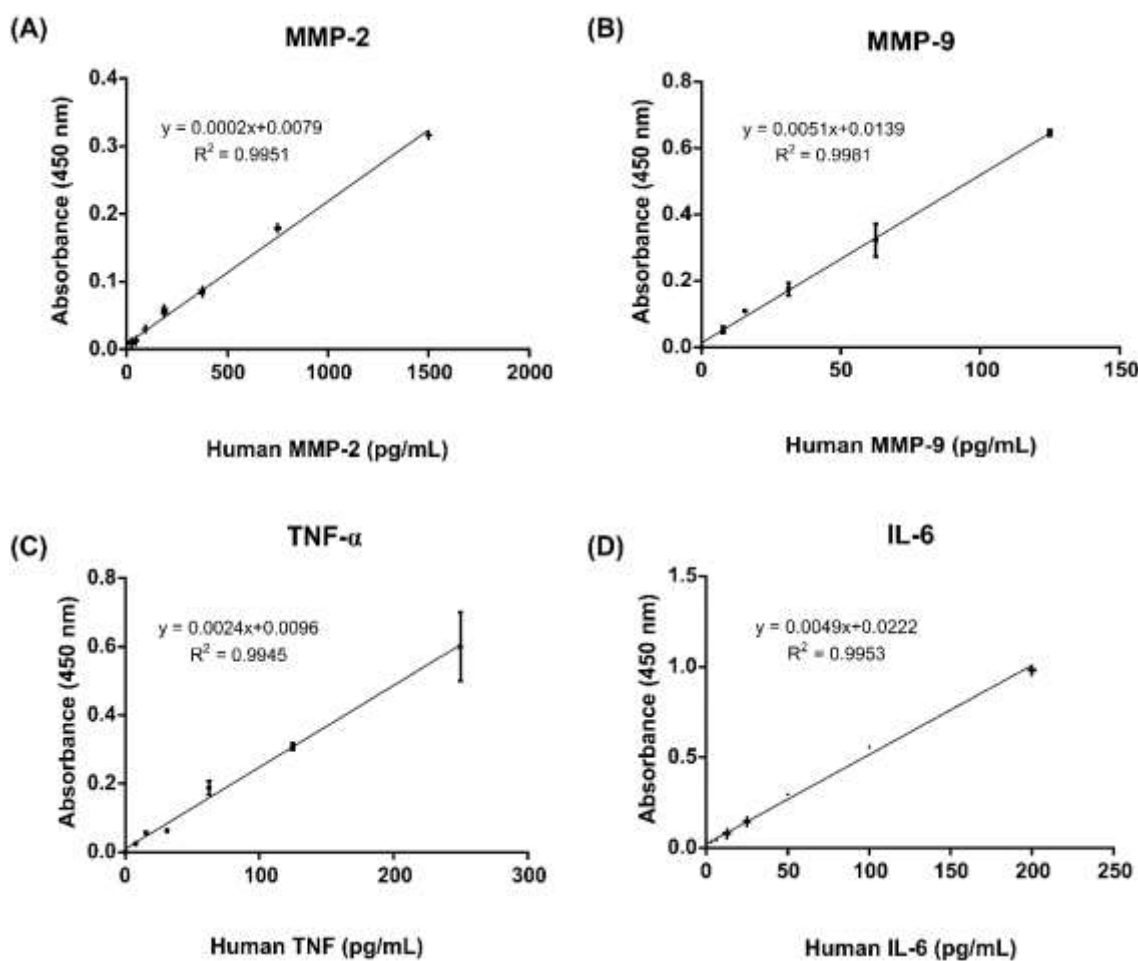

**Figure S1.** Calibration curves of the different biomarkers: (A) MMP-2; (B) MMP-9; (C) TNF- $\alpha$ ; (D) IL-6.

**Table S1.** Conditions used in the ELISA assays for the biomarkers TNF $\alpha$ -, IL-6, MMP-2 and MMP-9.

|               | <b>Biomarker</b>                                                                | <b>Recombinant Protein Concentration</b> | <b>Linear range</b> | <b>ELISA/Antibody information</b>                                                                                                                                                                    |
|---------------|---------------------------------------------------------------------------------|------------------------------------------|---------------------|------------------------------------------------------------------------------------------------------------------------------------------------------------------------------------------------------|
| TNF- $\alpha$ | Human recombinant TNF (Cat. No.: 88-7346-22, ebioscience)                       | 250 pg/mL                                | 4–250 pg/mL         | Human TNF- $\alpha$ Elisa Kit (Cat # 88-7346-88, Invitrogen)                                                                                                                                         |
| IL-6          | Human recombinant IL-6 (Cat. No.: 88-7066-88, ebioscience)                      | 200 pg/mL                                | 3–200 pg/mL         | Human IL-6 Elisa Kit (Cat # 88-7066-22, Invitrogen)                                                                                                                                                  |
| MMP-2         | Human recombinant MMP-2 (Part 76963, Biolegend)                                 | 1500 pg/mL                               | 23–1500 pg/mL       | Purified anti-MMP-2 (Clone: M6303D01, 0.5 mg/mL, Biolegend); 2 $\mu$ g/mL<br>Biotin anti-human MMP-2 (Clone: M6310C11, 0.5 mg/mL, Biolegend); 1 $\mu$ g/mL                                           |
| MMP-9         | Human Recombinant MMP-9 (Met1-Asp707) Protein (Cat No.: 1399990243, Immunostep) | 125 pg/mL                                | 7.8–125 pg/mL       | Anti-Human MMP-9 purified mouse monoclonal (REF. 1399990241, 1 mg/mL, Immunostep); 4 $\mu$ g/mL<br>Anti-Human MMP-9 Biotin Rabbit Polyclonal (REF. 1399990242, 0.77 mg/mL, Immunostep); 2 $\mu$ g/mL |

**Table S2.** Analytical performance of the optimized ELISA assays.

| <b>Biomarker</b> | <b>Inter-Assay (CV%) (<i>n</i> = 8)</b> | <b>Intra-Assay (CV%) (<i>n</i> = 100)</b> | <b>% Recovery rate (<i>n</i> = 10)</b> |
|------------------|-----------------------------------------|-------------------------------------------|----------------------------------------|
| TNF (pg/mL)      | 9.6                                     | 9.33                                      | 98.9 $\pm$ 5.5                         |
| IL-6 (pg/mL)     | 8.62                                    | 2.81*                                     | 92.2 $\pm$ 4.1                         |
| MMP-9 (pg/mL)    | 4.98                                    | 6.97                                      | 93.5% $\pm$ 1.79                       |
| MMP-2 (pg/mL)    | 6.32                                    | 5.79                                      | 100.1% $\pm$ 1.0                       |

**Note:** Inter-assay (CV%) was determined by measuring ELISA controls with low and high concentrations in multiple assays to monitor plate-to-plate variations; Intra-assay (%CV) was determined to analyse the variation of triplicates of samples and ELISA controls; % Recover rate –was determined to assess the reliability of the methodology. \* For IL-6, the *n* = 10 and was calculated using the data from the ELISA controls, since we did not detect this biomarker in the samples.

**Table S3.** ROC curves for CRC diagnosis.

| <b>Contrast Result Variables</b> | <b>Area Under the Curve</b> | <b>Error Tip.</b> |
|----------------------------------|-----------------------------|-------------------|
| Hb (ng/mL)                       | 0.892                       | 0.025             |
| M2-PK (U/mL)                     | 0.673                       | 0.045             |
| TNF (pg/mL)                      | 0.535                       | 0.043             |
| MMP-9 (pg/mL)                    | 0.489                       | 0.044             |
| MMP-2 (pg/mL)                    | 0.481                       | 0.044             |
